# Supplementary material for: SARS-CoV-2 booster vaccination rescues attenuated IgG1 memory B cell response in primary antibody deficiency patients
Source: Frontiers journal article supplement (doi:10.3389/fimmu.2022.1033770), 2022-12-22
Supplement: Data_Sheet_1.pdf [file Data_Sheet_1.pdf]

Supplementary Material for

## **SARS-CoV-2 booster vaccination rescues attenuated IgG1 memory B cell response in primary antibody deficiency patients**

Frank J. Lin<sup>1,9</sup>, Alexa Michelle Altman Doss<sup>2,9</sup>, Hannah G. Davis-Adams<sup>1</sup>, Lucas J. Adams<sup>3</sup>, Christopher H. Hanson<sup>1</sup>, Laura A. VanBlargan<sup>1</sup>, Chieh-Yu Liang<sup>1,3</sup>, Rita. E. Chen<sup>1,3</sup>, Jennifer Marie Monroy<sup>1</sup>, H. James Wedner<sup>1</sup>, Anthony Kulczycki<sup>1</sup>, Tarisa L. Mantia<sup>1</sup>, Caitlin C. O'Shaughnessy<sup>1</sup>, Saravanan Raju<sup>3</sup>, Fang R. Zhao<sup>1</sup>, Elise Rizzi<sup>1</sup>, Christopher J. Rigell<sup>1</sup>, Tiffany Bason Dy<sup>1</sup>, Andrew L. Kau<sup>1,4</sup>, Zhen Ren<sup>1</sup>, Jackson S. Turner<sup>3</sup>, Jane A. O'Halloran<sup>1</sup>, Rachel M. Presti<sup>1, 6</sup>, Daved H. Fremont<sup>3</sup>, Peggy L. Kendall<sup>1</sup>, Ali H. Ellebedy<sup>3, 5, 6</sup>, Philip A. Mudd<sup>6, 8</sup>, Michael S. Diamond<sup>1,3,5,6, 7</sup>, Ofer Zimmerman<sup>\*1</sup>, and Brian J. Laidlaw<sup>\*1</sup>

### **Affiliations:**

<sup>1</sup> Department of Medicine, Washington University School of Medicine, St. Louis, MO, USA.

<sup>2</sup> Department of Pediatrics, Washington University School of Medicine, St. Louis, MO, USA.

<sup>3</sup> Department of Pathology and Immunology, Washington University School of Medicine, St. Louis, MO, USA.

<sup>4</sup> Center for Women's Infectious Disease Research, Washington University School of Medicine, St. Louis, MO, USA.

<sup>5</sup> The Andrew M. and Jane M. Bursky Center for Human Immunology & Immunotherapy Programs, Washington University School of Medicine, Saint Louis, MO, USA.

<sup>6</sup> Center for Vaccines and Immunity to Microbial Pathogens, Washington University School of Medicine, Saint Louis, MO, USA.

<sup>7</sup> Department of Molecular Microbiology, Washington University School of Medicine, St. Louis, MO, USA.

<sup>8</sup> Department of Emergency Medicine, Washington University School of Medicine, St. Louis, MO, USA.

<sup>9</sup> These authors contributed equally to this work and share first authorship

\* Correspondence should be addressed to Brian Laidlaw (brian.laidlaw@wustl.edu) and Ofer Zimmerman (zimmero@wustl.edu)

### **This PDF includes:**

Supplementary methods

Supplementary references

**Fig. S1.** Baseline phenotype of PAD patients and healthy donor cohorts

**Fig S2.** COVID-19-experienced PAD patients have an elevated RBD-specific B cell response following primary vaccination series

**Fig. S3.** COVID-19-naïve PAD patients have an elevated RBD-specific B cell response following booster vaccination

**Fig. S4.** Isotype composition of SARS-CoV-2 RBD-specific memory B cell response following vaccination in PAD patients

**Fig. S5.** RBD-specific memory B cells from PAD patients display reduced CD11c expression class.

**Fig. S6.** Booster vaccination induces similar percentages of Ancestral and Omicron Spike<sup>+</sup> B cells

**Fig. S7.** Additional phenotyping of SARS-CoV-2-specific CD4<sup>+</sup> T cell response following vaccination in PAD patients

**Table S1.** Characteristics of patient cohort

**Table S2.** Cellular phenotype of patient cohort

**Table S3.** PAD patient laboratory values

**Table S4.** PAD patient responses to other vaccine antigens at time of diagnosis

## SUPPLEMENTARY METHODS

**Diagnosis criteria for primary antibody deficiency syndromes cohort.** Participant records were reviewed to verify that they met criteria for the diagnosis of CVID, hypogammaglobulinemia or SAD. CVID was defined by history of recurrent infections and other clinical features of CVID (e.g., autoimmunity, pulmonary or GI disease), low IgG (normal range 700-1600 mg/dL), with low IgA (normal range 70-400 mg/dL) or low IgM (normal range 40-230 mg/dL) levels and poor or absent response to vaccination, without apparent secondary causes noted at diagnosis or during early follow-up (68,69). Hypogammaglobulinemia was defined by recurrent infections with low IgG and normal response to vaccination. SAD was defined by recurrent infections and inadequate antibody response to polysaccharide antigens with normal response to protein antigens and normal serum levels of immunoglobulins (IgG, IgA, and IgM). Due to the retrospective nature of this work, we accepted the diagnosis of CVID in patients that had typical clinical features and were responsive to immunoglobulin replacement therapy even if IgA or IgM levels were both normal, as long as IgG levels were significantly reduced (IgG < 550 mg/dL) and the response to Pneumovax vaccination was poor (70). We also accepted the clinical diagnosis in one patient that was diagnosed with CVID decades ago with undetectable levels of IgA and IgM where we could not obtain pre-intravenous immunoglobulin (IVIg) therapy IgG levels or anti-*Streptococcus pneumoniae* titers. A diagnosis of CVID was also accepted in patients with extremely low levels of IgG (n=4; Range 177-346 mg/dL) and low levels of IgA and IgM who were started on IVIG without an assessment of their response to vaccination.

**Preparation of peripheral blood mononuclear cells.** Patient blood was collected in sodium citrate cell preparation tubes (BD Biosciences). Tubes were centrifuged at room temperature for 30 min at 1650 x g without brake. The mononuclear cells and plasma layer were then transferred to a 50 mL conical tube and centrifuged at room temperature for 10 min at 256 x g. Supernatant was removed without disturbing the cell pellet. Cells were resuspended in PBS, and all cells of the same subject were combined into one 15-mL conical tube. Cells were centrifuged as above. Supernatant was removed without disturbing the cell pellet, and cells were resuspended in 5 mL of ACK lysing buffer (Thermo Fisher) for 5 min. Cells were washed with PBS, counted, washed again with PBS, resuspended in 10% dimethylsulfoxide in FBS at 10<sup>6</sup> cells per mL and aliquoted into cryovials. Cryovials were transferred to a freezing container (Daigger Scientific, Mr. Frosty) and placed in a -80°C freezer overnight before being transferred to liquid nitrogen for storage.

**Antibodies for flow cytometry staining.** Staining for flow cytometry was performed using cryopreserved PBMC samples. Cryopreserved samples were thawed in a 37°C water bath and added to tubes containing RPMI with 10% FBS and 1% penicillin/streptomycin solution (Fisher). Cells then were centrifuged at 300 x g at room temperature, resuspended in 10% RPMI, and counted. 3 x 10<sup>6</sup> cells were then aliquoted to a 96 well plate and centrifuged at 810 x g for 2 min at 4°C. The cells were then washed with PBS containing 2% FBS, centrifuged, and then incubated with the primary antibody mix for 30 min on ice. Samples that were stained with a tetramer-containing antibody cocktail were incubated for 45 min. Cells were then washed three times with 2% PBS and incubated with secondary antibody mix for an additional 30 min. Samples then were washed an additional three times with 2% PBS before being resuspended for flow cytometry analysis. Flow cytometry data were acquired on a Cytex Aurora and were analyzed with FlowJo software (TreeStar).

The following antibodies were used for flow cytometry staining: Brilliant Violet 711 (BV711) anti-CD11c (301630), BV750 anti-CD19 (302262), allophycocyanin (APC)/Fire 810 anti-CD3 (344858), BV510 anti-IgD (348220), BV605 anti-IgM (314524), phycoerythrin (PE)/Dazzle 594 anti-CXCR5 (356928), APC anti-his (362605), PE/Fire 810 anti-CD27 (302859), APC/Fire 750 anti-CD20 (302358), Zombie NIR (423106), phycoerythrin-indotricarbocyanine (PE-Cy7) anti-

CD71 (334112), BV650 BV570 anti-CD45RO (304226), FITC anti-CCR7 (353216), BV605 anti-HLA-DR (307640), Alexa Fluor 700 anti-CD4 (344622), Alexa Fluor 594 anti-CD8 (301056), peridinin chlorophyll protein Cy5.5 (PerCpCy5.5) (304122), PE/Fire 810 anti-CD27 (302859), BV421 anti-ICOS (313524) (all from Biolegend); Biotin anti-IgG3 (OB9210-08), Alexa Fluor 555 anti-IgG2 (OB907032), PE anti-IgG1 (OB905409), FITC anti-IgA (CBL114FMI), Brilliant Blue 700 (BB700) anti-CD38 (BDB566445), PE-Cy7 anti-PD1 (BDB561272) (all from Fisher).

**His-tagged SARS-CoV-2 protein purification.** Genes encoding SARS-CoV-2 Wuhan-Hu-1 spike protein (residues 1-1213, GenBank: MN908947.3), the Wuhan-Hu-1 RBD (residues 319-514), BA.1 spike protein were cloned into a pCAGGS mammalian expression vector with a C-terminal hexahistidine tag. Both spike proteins were prefusion stabilized and expression optimized with six proline substitutions (F817P, A892P, A899P, A942P, K986P, V987P), with a disrupted S1/S2 furin cleavage site and a C-terminal foldon trimerization motif (YIPEAPRDGQAYVRKDGWVLLSTFL) (71). Expi293F cells were transiently transfected, and proteins were recovered via cobalt-charged resin chromatography (G-Biosciences) as previously described (38,39).

**HLA class II tetramers.** HLA class II tetramers representing the HLA-DPA1\*01:03/HLA-DPB1\*04:01-restricted SARS-CoV-2 spike protein epitopes S<sub>167-180</sub> (TFEYVSQPFLMDLE) and S<sub>816-830</sub> (SFIEDLLFNKVTLD) were constructed by cloning the relevant peptides into an AbVec vector system containing the appropriate HLA alpha and beta chains linked to the peptide of interest via a flexible linker at the N-terminus of the beta chain (51–53). This system includes corresponding leucine zipper motifs on the alpha and beta chains to promote HLA monomer stability. Proteins were expressed in 293F cells transfected with the appropriate AbVec vector. Purified HLA monomer was biotinylated with BioA enzyme in biotinylation buffer (0.2 M NaCl, 0.1 M Tris pH 7.5, 5 mM MgCl<sub>2</sub>, 5 mM ATP, 0.4 mM Biotin, 5 uM Leupeptin, 1 uM Pepstatin, and 0.2 mM PMSF). The monomer was then tetramerized and fluorochrome labeled by adding Streptavidin-R-Phycoerythrin (Agilent) to the S<sub>167-180</sub> monomer or Streptavidin-Allophycocyanin (Agilent) to the S<sub>816-830</sub> monomer (72).

**Focus reduction neutralization test.** Neutralizing antibody titers were performed with authentic SARS-CoV-2 strains and variants as previously described (73).

## SUPPLEMENTARY REFERENCES

68. Dati F, Schumann G, Thomas L, Aguzzi F, Baudner S, Bienvenu J, Blaabjerg O, Blirup-Jensen S, Carlström A, Petersen PH, et al. Consensus of a group of professional societies and diagnostic companies on guidelines for interim reference ranges for 14 proteins in serum based on the standardization against the IFCC/BCR/CAP Reference Material (CRM 470). International Federation of Clinical Chemistry. Community Bureau of Reference of the Commission of the European Communities. College of American Pathologists. *European J Clin Chem Clin Biochem J Forum European Clin Chem Soc* (1996) 34:517–20.
69. Bonilla FA, Barlan I, Chapel H, Costa-Carvalho BT, Cunningham-Rundles C, Morena MT de la, Espinosa-Rosales FJ, Hammarström L, Nonoyama S, Quinti I, et al. International Consensus Document (ICON): Common Variable Immunodeficiency Disorders. *J Allergy Clin Immunol Pract* (2016) 4:38–59. doi: 10.1016/j.jaip.2015.07.025
70. Ameratunga R, Woon S-T, Gillis D, Koopmans W, Steele R. New diagnostic criteria for COVID. *Expert Rev Clin Immunol* (2014) 10:183–186. doi: 10.1586/1744666x.2014.875274
71. Hsieh C-L, Goldsmith JA, Schaub JM, DiVenere AM, Kuo H-C, Javanmardi K, Le KC, Wrapp D, Lee AG, Liu Y, et al. Structure-based design of prefusion-stabilized SARS-CoV-2 spikes. *Science* (2020) 369:eabd0826. doi: 10.1126/science.abd0826
72. Willis RA, Ramachandiran V, Shires JC, Bai G, Jeter K, Bell DL, Han L, Kazarian T, Ugwu KC, Laur O, et al. Production of Class II MHC Proteins in Lentiviral Vector-Transduced HEK-293T Cells for Tetramer Staining Reagents. *Curr Protoc* (2021) 1:e36. doi: 10.1002/cpz1.36
73. Case JB, Bailey AL, Kim AS, Chen RE, Diamond MS. Growth, detection, quantification, and inactivation of SARS-CoV-2. *Virology* (2020) 548:39–48. doi: 10.1016/j.virol.2020.05.015

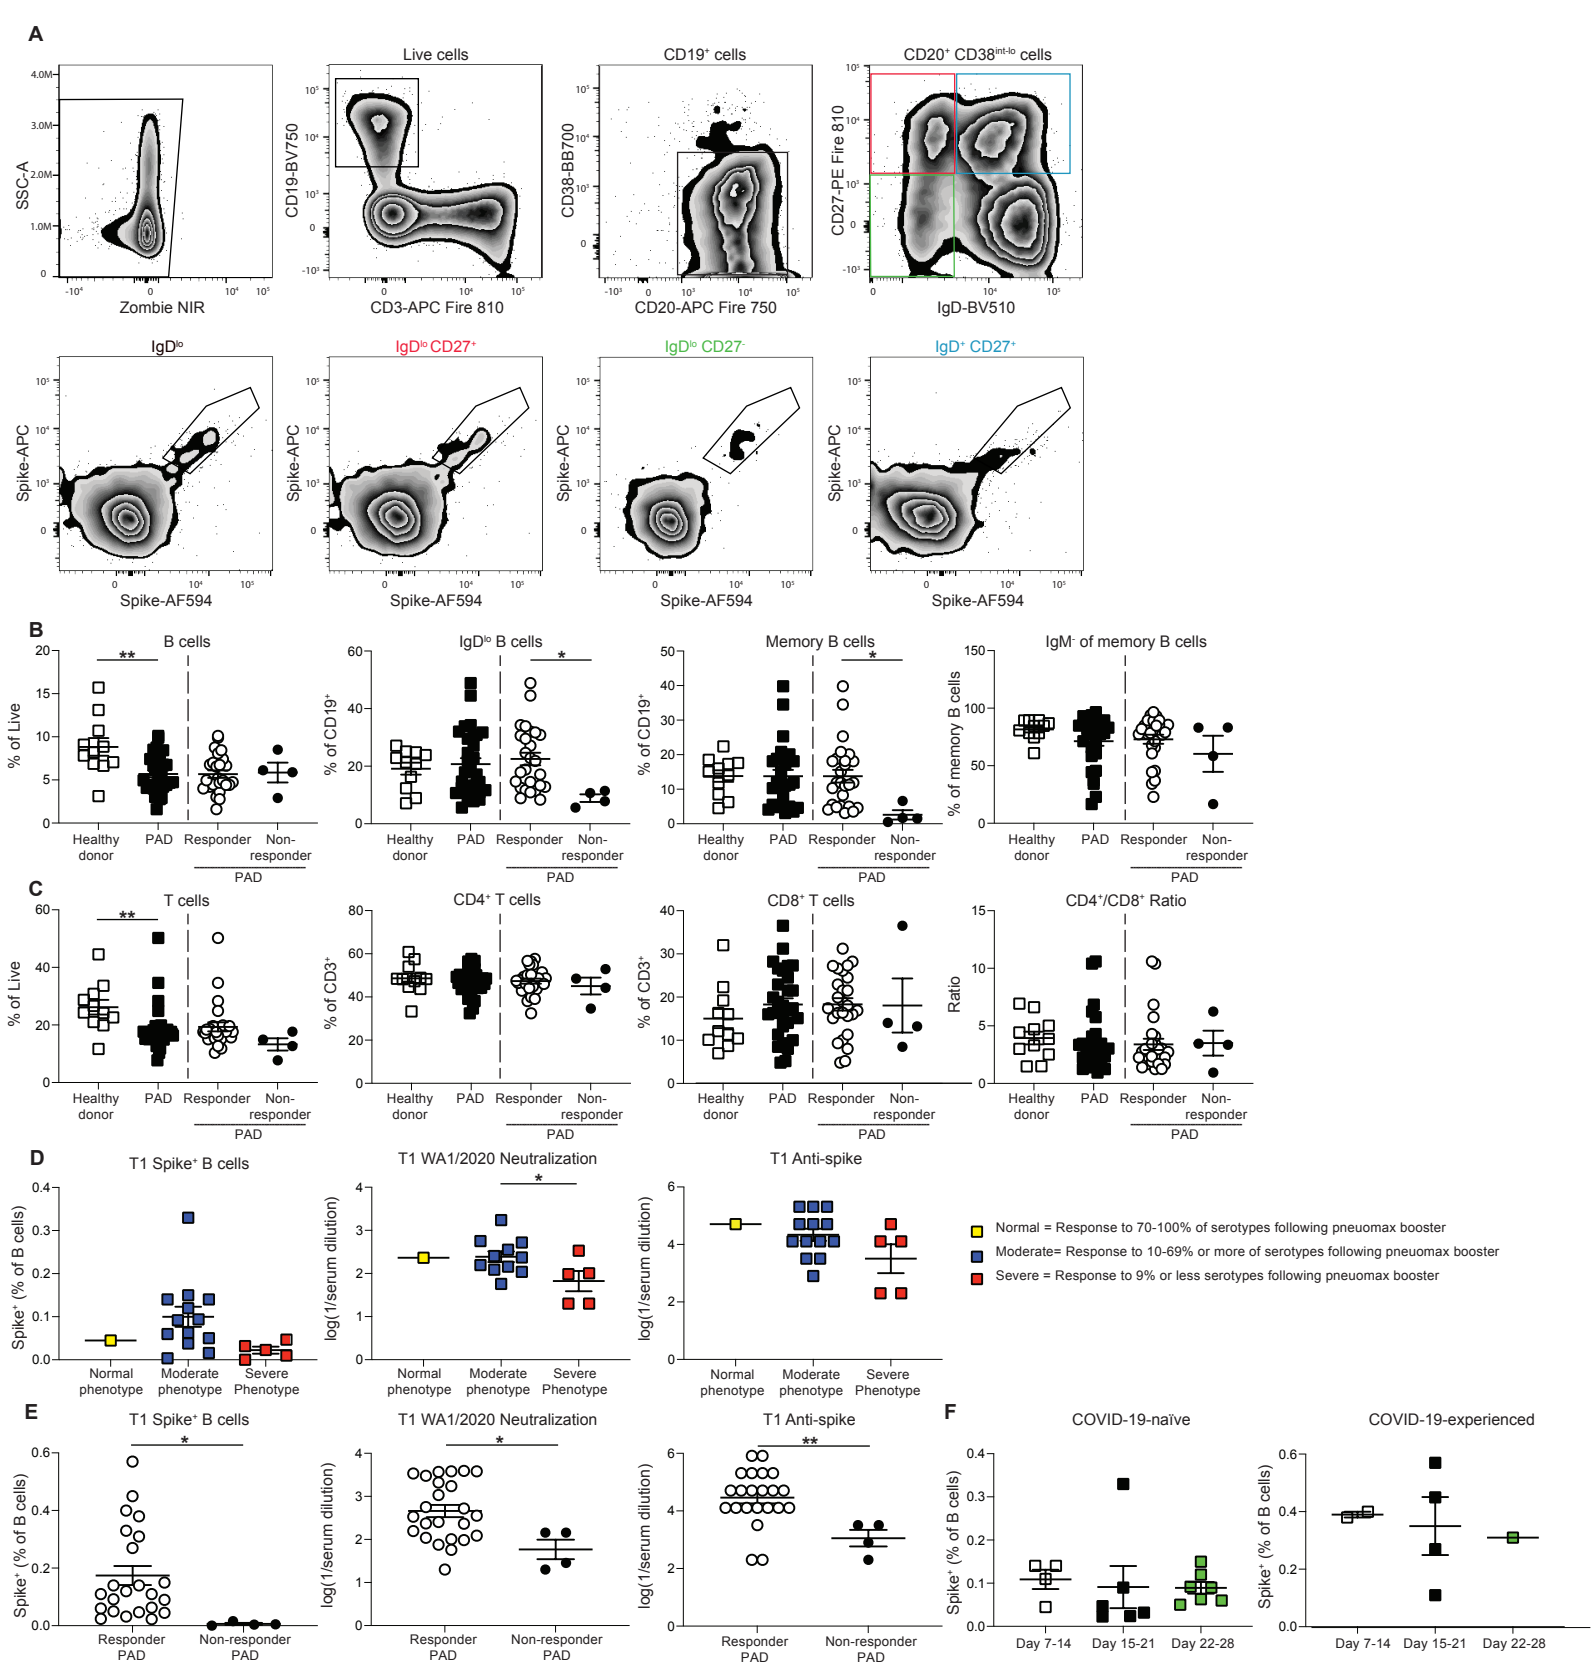

**Figure S1**

**Figure S1. Baseline phenotype of PAD patients and healthy donor cohorts.** (A) Representative B cell flow cytometry gating scheme. (B) Percentage of live cells that are B (CD19<sup>+</sup>CD3<sup>-</sup>) cells at T1 in patient cohorts (left). Percentage of B cells that are IgD<sup>lo</sup> (middle left) or memory (IgD<sup>lo</sup>CD27<sup>+</sup>) at T1 in patient cohorts (middle right). Percentage of memory B cells that are IgM<sup>-</sup> in patient cohorts. (right). Non-responders are defined as PAD patients in which the CD19<sup>+</sup> IgD<sup>lo</sup> Spike<sup>+</sup> B cells response was <0.02% of total B cells at T1. (C) Percentage of live cells that are T (CD3<sup>+</sup>CD19<sup>-</sup>) cells at T1 in patient cohorts. (left) Percentage of T cells that are CD4<sup>+</sup> (CD4<sup>+</sup>CD8<sup>-</sup>) (middle left) or CD8<sup>+</sup> (CD8<sup>+</sup>CD4<sup>-</sup>) (middle right) in patient cohorts. Ratio of CD4<sup>+</sup> to CD8<sup>+</sup> T cells (right) in patient cohorts. (D) Percentage of IgD<sup>lo</sup> Spike<sup>+</sup> cells among the B (Live CD19<sup>+</sup> CD3<sup>-</sup>) cell population (left), serum neutralizing activity against WA1/2020 (middle), and anti-spike end point antibody titer (right) at T1 in COVID-19-naïve PAD patients with a normal, moderate, or severe immunodeficiency phenotype. Immunodeficiency phenotypes were determined based on the number of protective titers to specific serotypes induced at 4 to 6 weeks following booster vaccination with Pneumovax. (E) Percentage of IgD<sup>lo</sup> Spike<sup>+</sup> cells among the B (Live CD19<sup>+</sup> CD3<sup>-</sup>) cell population (left), serum neutralizing activity against WA1/2020 (middle), and anti-spike end point antibody titer (right) at T1 in responder and non-responder PAD patients. (F) Percentage of IgD<sup>lo</sup> Spike<sup>+</sup> cells among the B (Live CD19<sup>+</sup> CD3<sup>-</sup>) cell population in COVID-19-naïve PAD (left) and COVID-19-experienced PAD (right) cohorts at T1 in which the T1 PBMC samples were obtained at 7-14 days, 15-21 days, or 22-28 days following administration of the 2<sup>nd</sup> vaccine dose. Statistical analyses were performed using an unpaired t-test comparing either the healthy and PAD groups or the responder and non-responder groups. Error bars were calculated based on the standard error of the mean. (\*,  $p < 0.05$ ; \*\*,  $p < 0.01$ ).

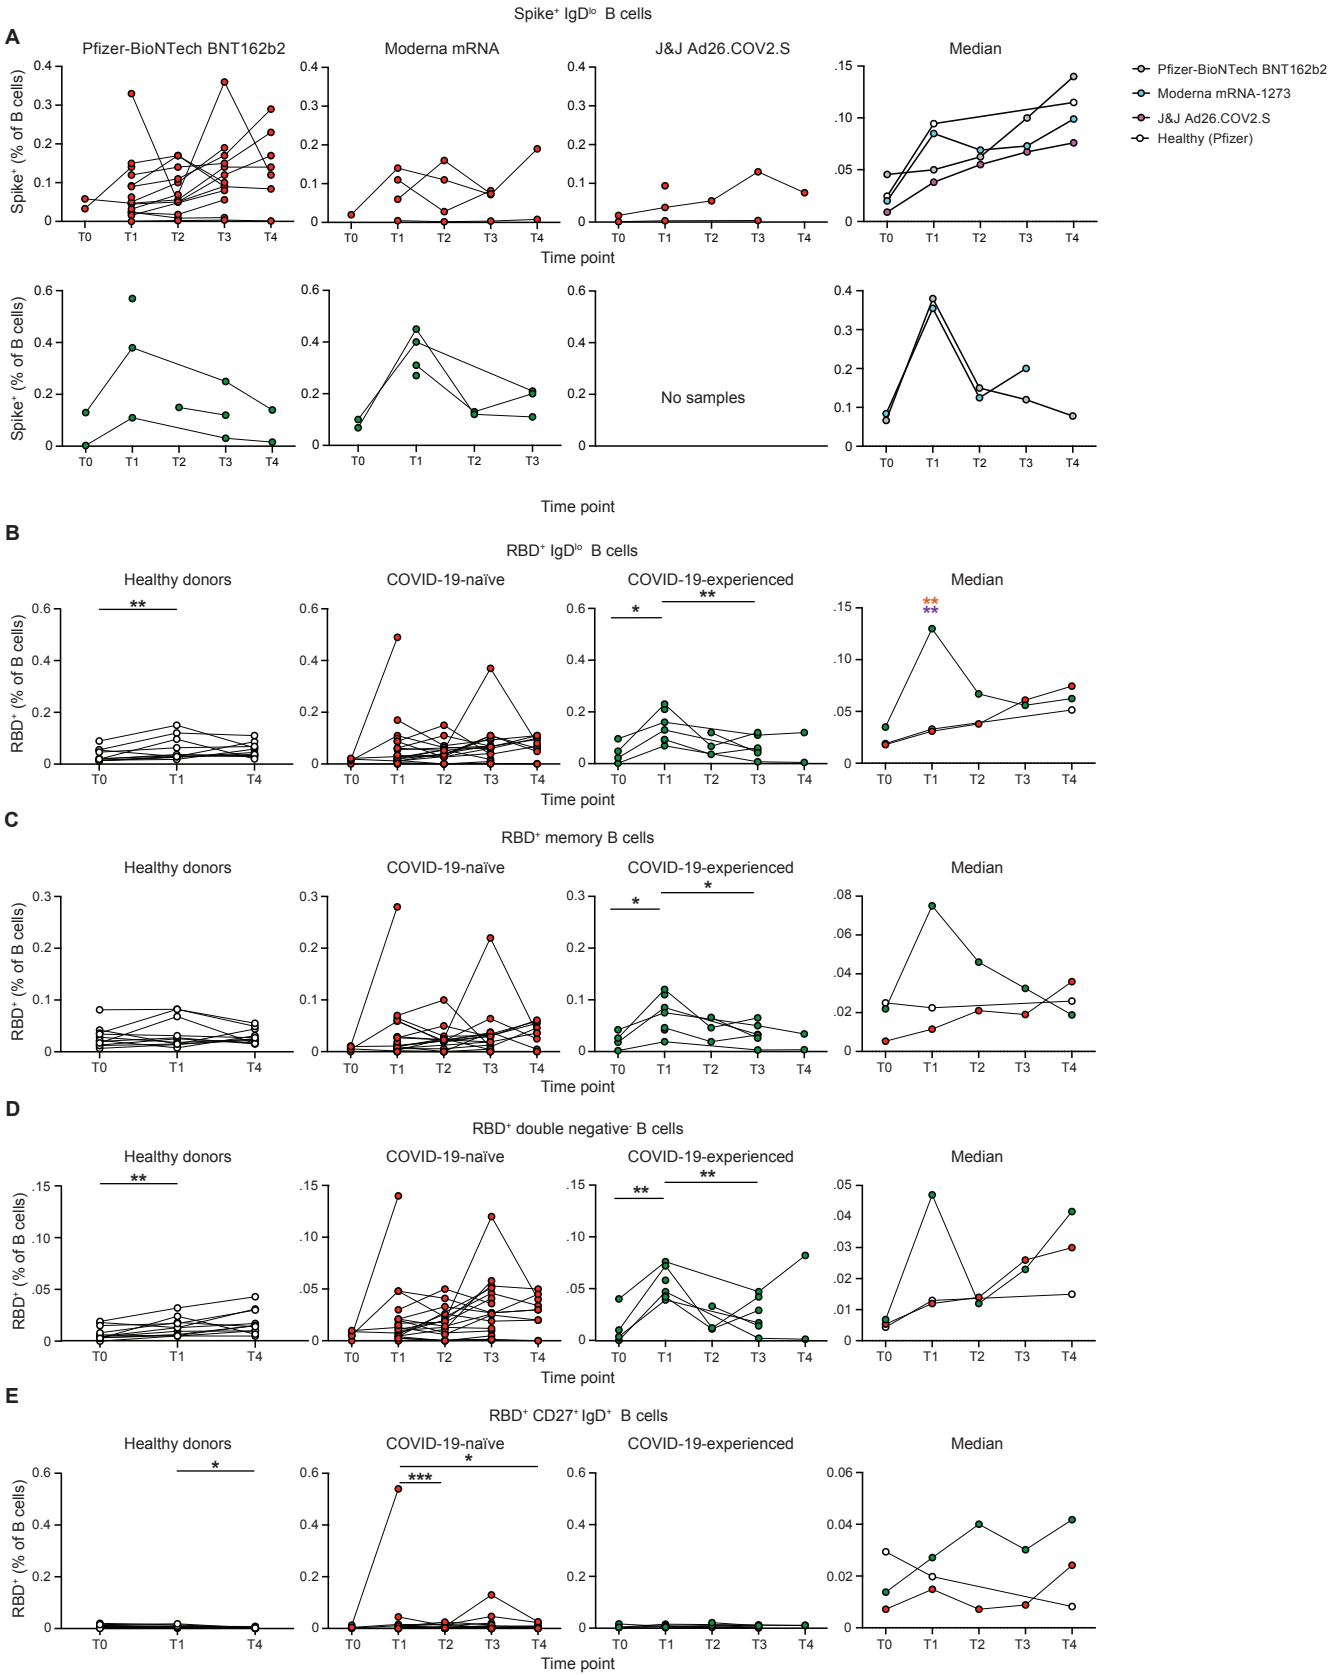

**Figure S2**

**Figure S2. COVID-19-experienced PAD patients have an elevated RBD-specific B cell response following primary vaccination series.** (A) Percentage of IgD<sup>lo</sup> Spike<sup>+</sup> cells among the B (Live CD19<sup>+</sup> CD3<sup>-</sup>) cell population in COVID-19-naïve (top) and COVID-19-experienced (bottom) PAD patients that received the Pfizer-BioNTech BNT162b2 (left), Moderna mRNA-1273 (middle left), and J&J Ad26.COVS.2 (middle right) vaccines. Median percentage of B cells that comprise each population in all groups is shown on right. There were no COVID-experienced PAD patients that received the J&J Ad26.COVS.2 vaccine. Percentage of (B) IgD<sup>lo</sup>, (C) memory (IgD<sup>lo</sup> CD20<sup>+</sup> CD38<sup>int-lo</sup> CD27<sup>+</sup>), (D) double negative (IgD<sup>lo</sup> CD20<sup>+</sup> CD38<sup>int-lo</sup> CD27<sup>-</sup>), and (E) IgD<sup>+</sup> CD20<sup>+</sup> CD38<sup>int-lo</sup> CD27<sup>+</sup> RBD<sup>+</sup> cells among the B (Live CD19<sup>+</sup> CD3<sup>-</sup>) cell population in healthy donors (left, white), COVID-19-naïve PAD (middle left, red), and COVID-19-experienced PAD (middle right, green) cohorts. Median percentage of B cells that comprise each population in all groups is shown on right. Statistical analyses were performed using a mixed effects model (for trends found between time points) or two-way ANOVA (for trends found between groups shown on the median graphs) with Fisher's least significant difference testing. Significance testing between time points was limited to comparisons relative to T1. Above the median graphs, an orange asterisk indicates a comparison between the COVID-19-naïve and COVID-19-experienced groups, and a purple asterisk indicates a comparison between the COVID-19-experienced and healthy donor groups (\*,  $p < 0.05$ ; \*\*,  $p < 0.01$ ; \*\*\*,  $p < 0.001$ ; \*\*\*\*,  $p < 0.001$ ).



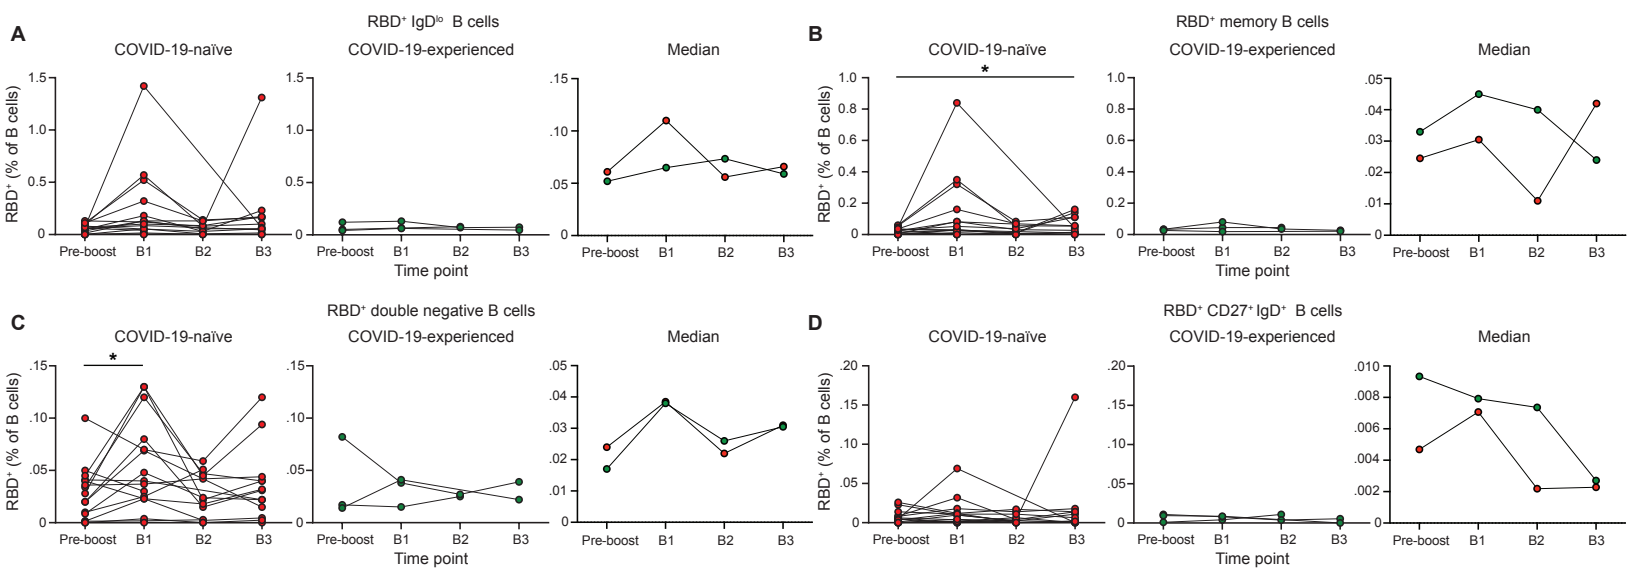

**Figure S3**

**Figure S3. COVID-19-naïve PAD patients have an elevated RBD-specific B cell response following booster vaccination.** Percentage of (A) IgD<sup>lo</sup>, (B) memory (IgD<sup>lo</sup> CD20<sup>+</sup> CD38<sup>int-lo</sup> CD27<sup>+</sup>), (C) double negative (IgD<sup>lo</sup> CD20<sup>+</sup> CD38<sup>int-lo</sup> CD27<sup>-</sup>), and (D) IgD<sup>+</sup> CD20<sup>+</sup> CD38<sup>int-lo</sup> CD27<sup>+</sup> RBD<sup>+</sup> cells among the B (Live CD19<sup>+</sup> CD3<sup>-</sup>) cell population in the COVID-19-naïve PAD (left, red) and COVID-19-experienced PAD (middle, green) cohorts. Median percentage of B cells that comprise each population in all groups is shown on right. Pre-boost group consists of the last sample obtained from each patient prior to booster vaccination. Statistical analyses were performed using a mixed effects model (for trends found between time points) with Fisher's least significant difference testing. Significance testing between time points was limited to comparisons relative to pre-boost (\*,  $p < 0.05$ ).

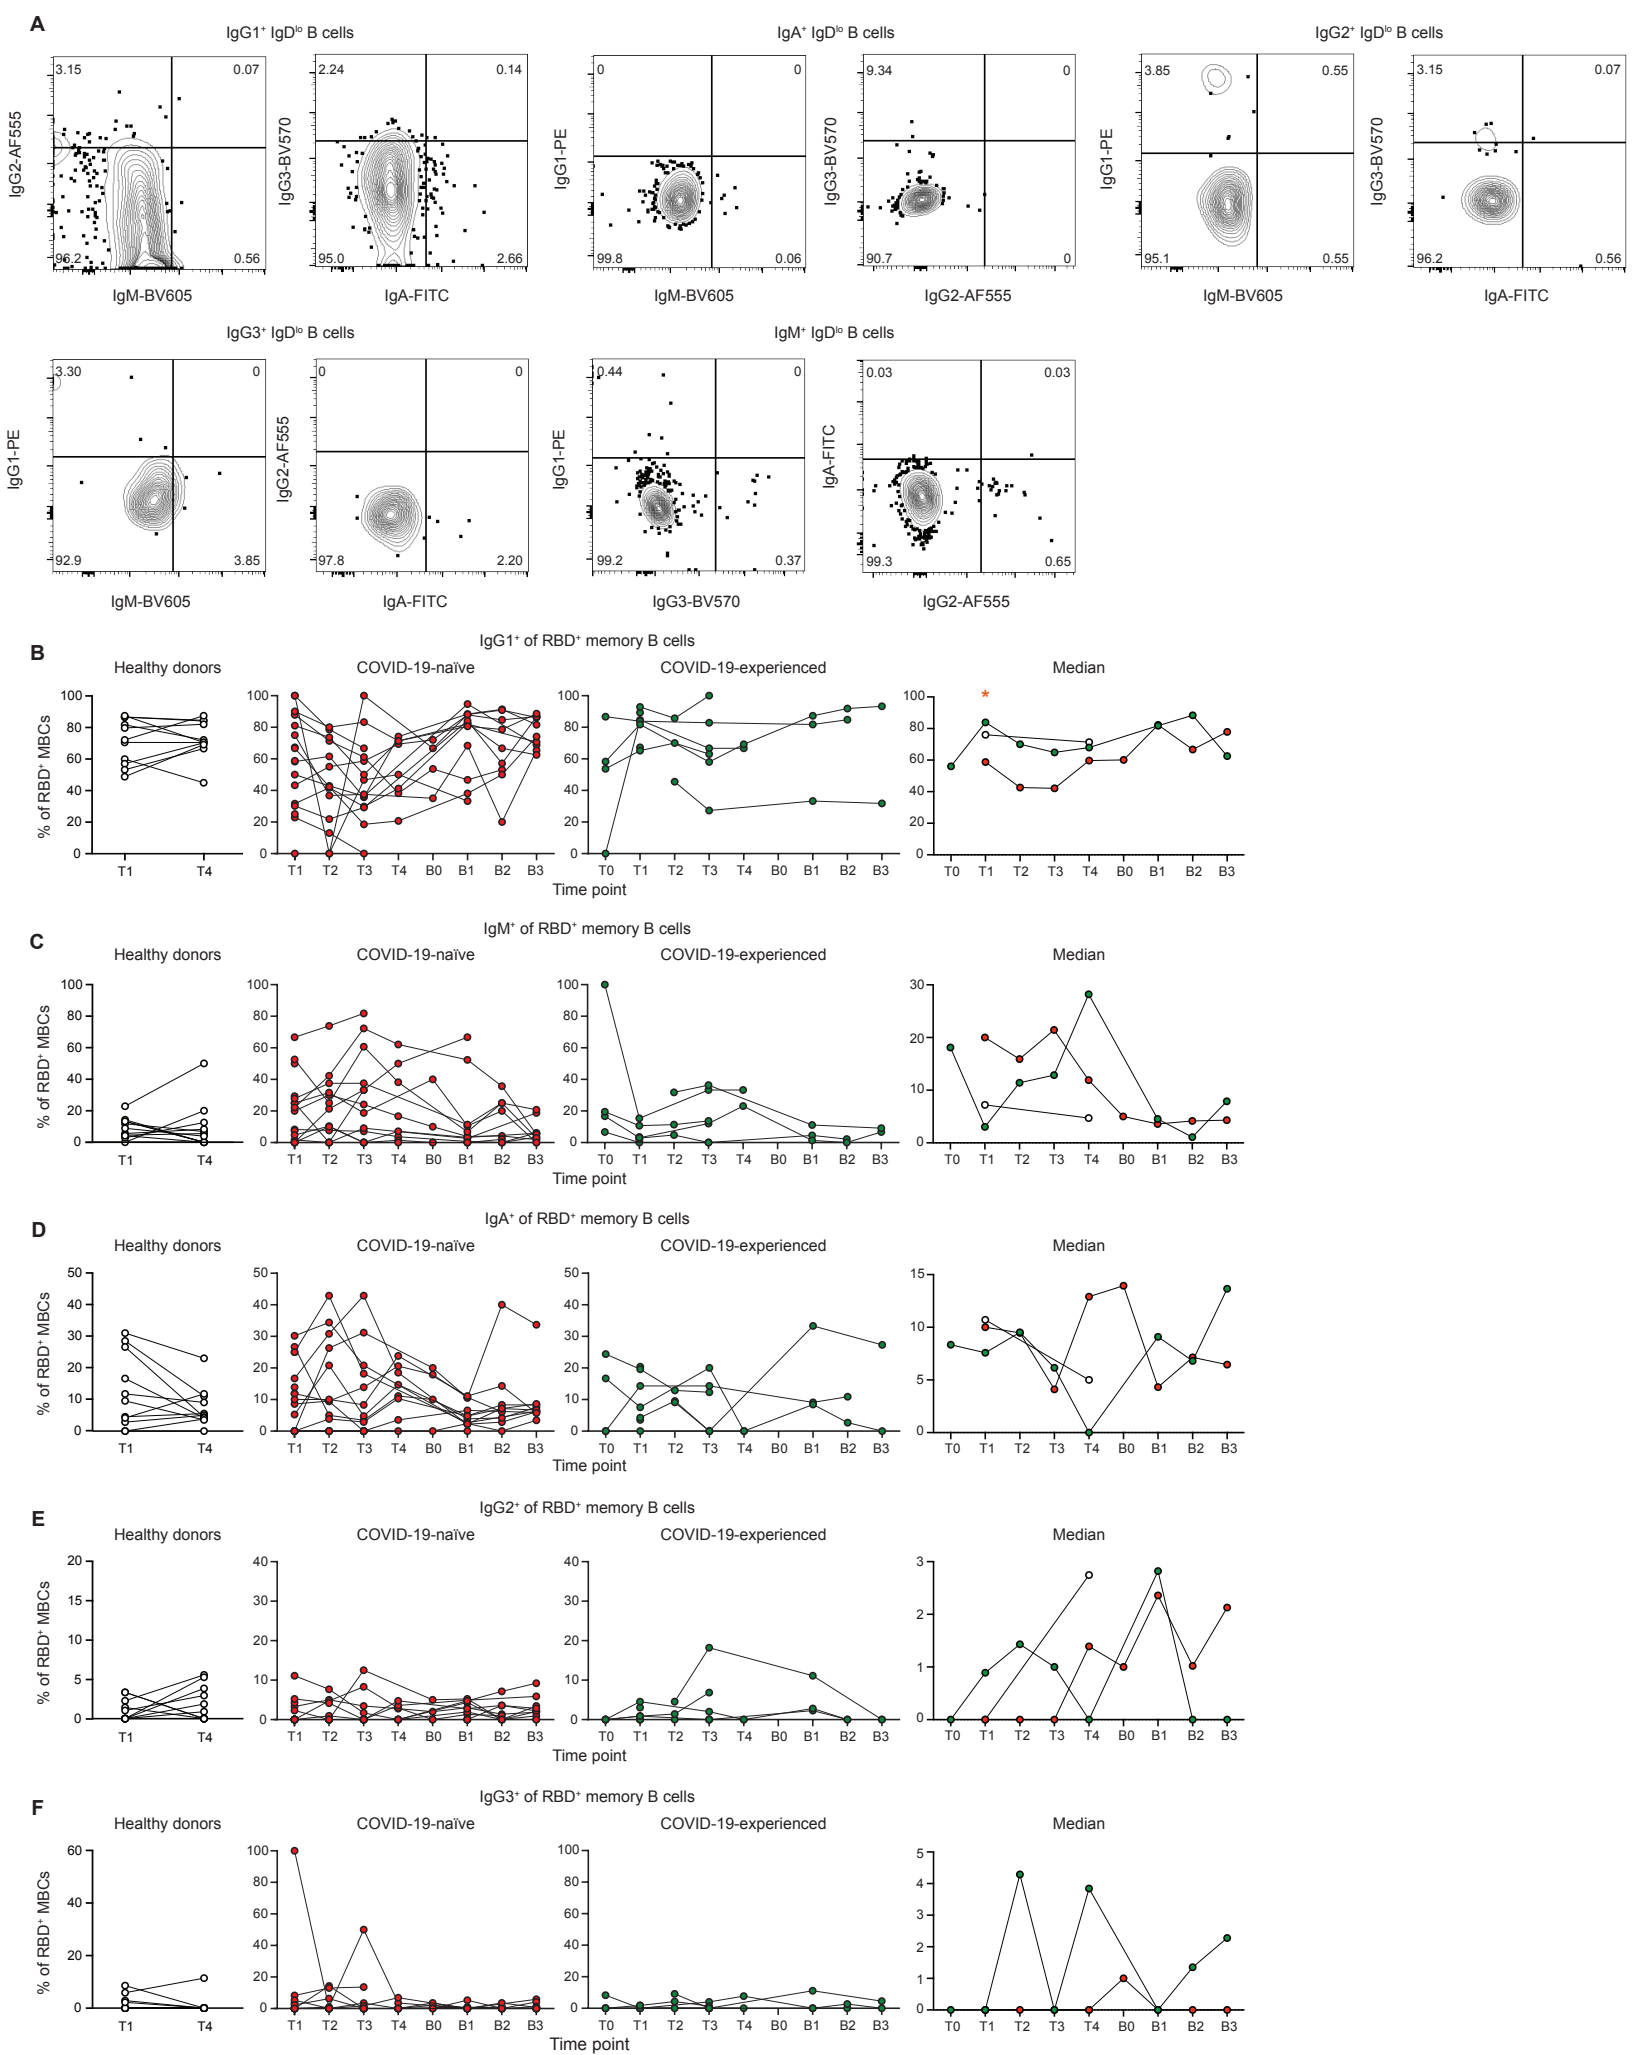

**Figure S4. Isotype composition of SARS-CoV-2 RBD-specific memory B cell response following vaccination in PAD patients.** (A) Representative flow cytometry plots of the expression of other isotypes in IgG1<sup>+</sup>, IgA<sup>+</sup>, IgG2<sup>+</sup>, IgG3<sup>+</sup>, and IgM<sup>+</sup> IgD<sup>lo</sup> B cells. Percentage of RBD<sup>+</sup> memory B cells that are (B) IgG1<sup>+</sup>, (C) IgM<sup>+</sup>, (D) IgA<sup>+</sup>, (E) IgG2<sup>+</sup>, and (F) IgG3<sup>+</sup> in healthy donors (left, white), COVID-19-naïve PAD (middle left, red), and COVID-19-experienced PAD (middle right, green) cohorts. Median percentage of B cells that comprise each population in all groups is shown on right. Statistical analyses were performed using a two-way ANOVA (for trends found between groups shown on the median graphs) with Fisher's least significant difference testing. Above the median graphs, an orange asterisk indicates a comparison between the COVID-19-naïve and -experienced groups (\*,  $p < 0.05$ ).

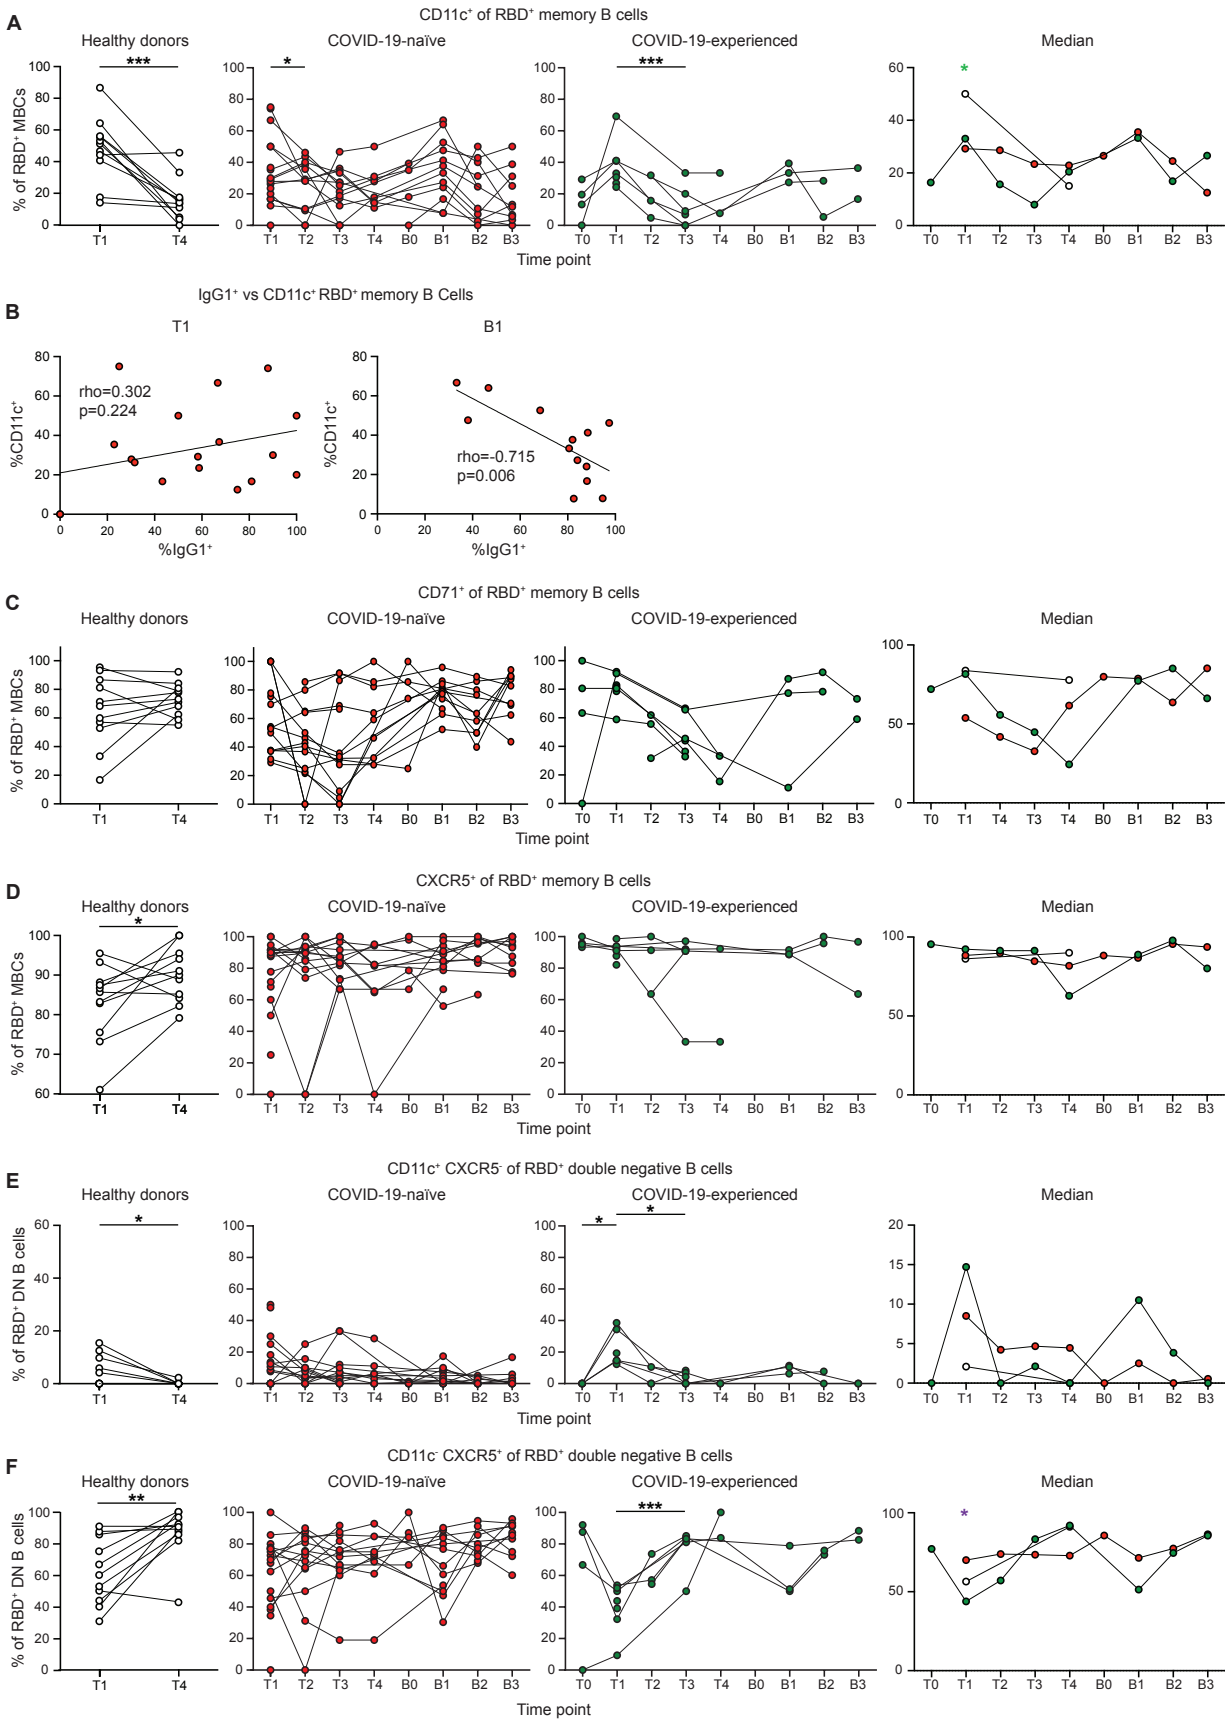

**Figure S5**

**Figure S5. RBD-specific memory B cells from PAD patients display reduced CD11c expression class.** (A) Percentage of RBD<sup>+</sup> memory B cells that are CD11c<sup>+</sup> in healthy donors (left, white), COVID-19-naïve PAD (middle left, red), and COVID-19-experienced PAD (middle right, green) cohorts. Median percentage of CD11c<sup>+</sup> cells in all groups is shown on right. (B) Correlation between percentage of RBD<sup>+</sup> memory B cells that are IgG1<sup>+</sup> and CD11c<sup>+</sup> at T1 (left) or B1 (right). Associations for B are calculated using Pearson rank correlation and shown with Pearson trend lines for visualization. Percentage RBD<sup>+</sup> memory B cells that are (C) CD71<sup>+</sup> or (D) CXCR5<sup>+</sup> in healthy donors (left, white), COVID-19-naïve PAD (middle left, red), and COVID-19-experienced PAD (middle right, green) cohorts. Median percentage of B cells that comprise each population in all groups is shown on right. Percentage of RBD<sup>+</sup> double negative B cells that are (E) CD11c<sup>+</sup> CXCR5<sup>-</sup> or (F) CD11c<sup>-</sup> CXCR5<sup>+</sup> in healthy donors (left, white), COVID-19-naïve PAD (middle left, red), and COVID-19-experienced PAD (middle right, green) cohorts. Median percentage of double negative B cells that comprise each population in all groups is shown on right. Statistical analyses in A, C-F were performed using a mixed effects model (for trends found between time points) or a two-way ANOVA (for trends found between groups shown on the median graphs) with Fisher's least significant difference testing. Significance testing between time points was limited to comparisons relative to T1. Above the median graphs, a green asterisk indicates a comparison between the COVID-19-naïve and healthy donor groups, a purple asterisk indicates a comparison between the COVID-19-experienced and healthy donor groups (\*,  $p < 0.05$ ; \*\*,  $p < 0.01$ ; \*\*\*,  $p < 0.001$ ).

B1

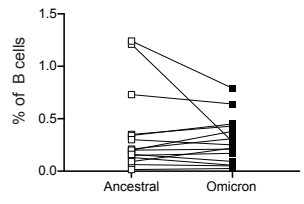

Figure S6

**Figure S6. Booster vaccination induces similar percentages of Ancestral and Omicron Spike<sup>+</sup> B cells.** Paired comparison of percentage of IgD<sup>lo</sup> ancestral Spike<sup>+</sup> and Omicron<sup>+</sup> cells among the B (Live CD19<sup>+</sup> CD3<sup>-</sup>) cell population at B1.



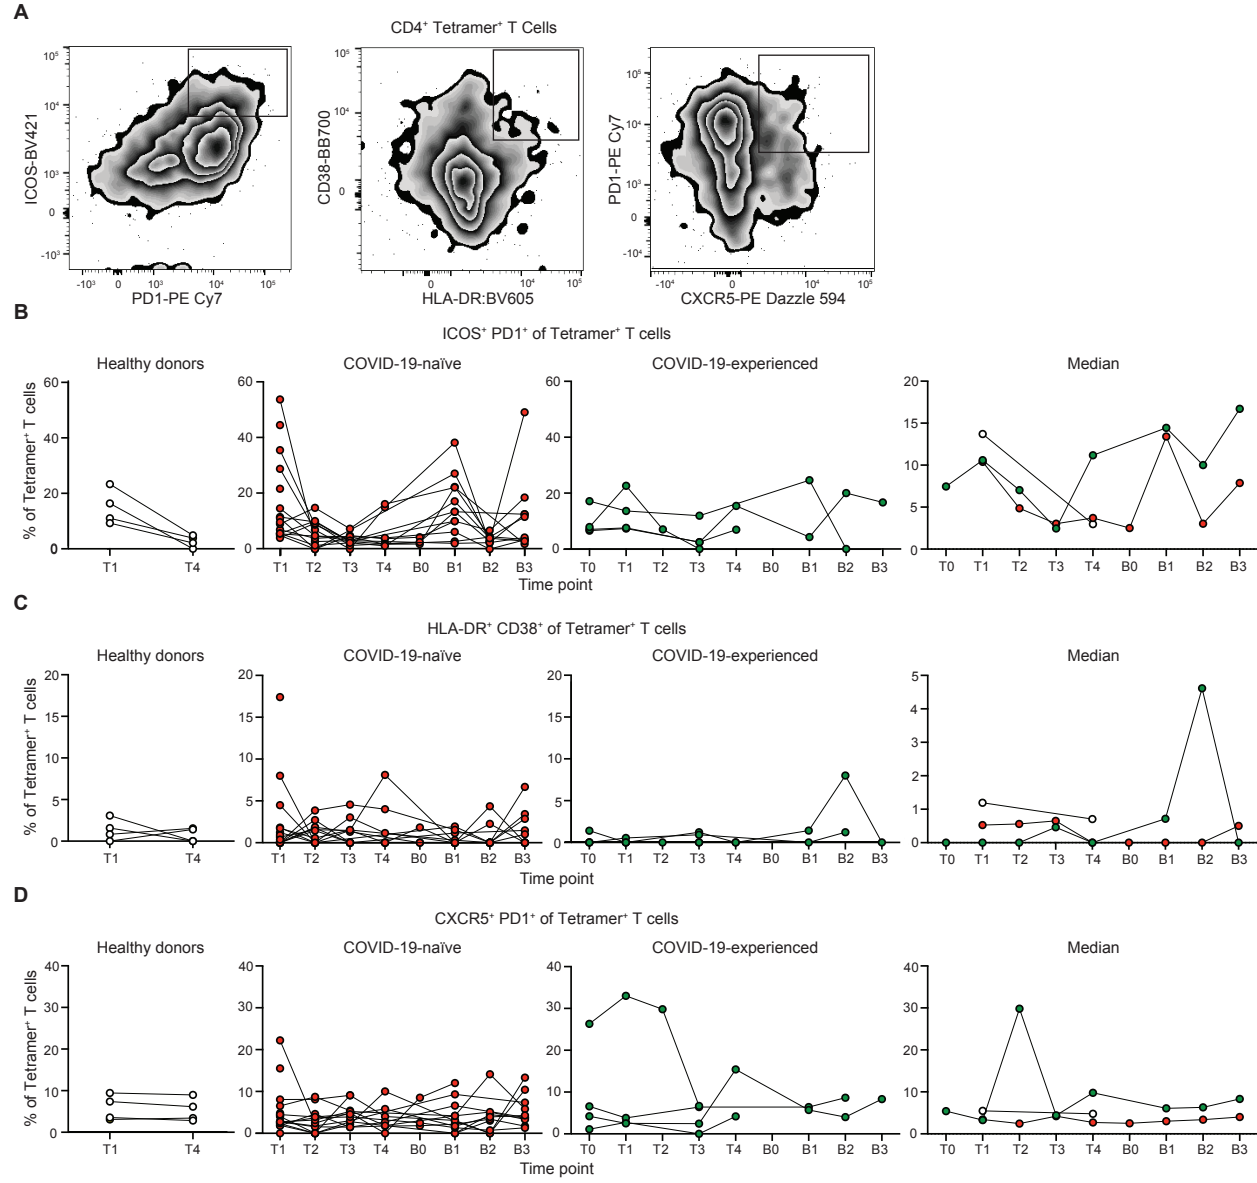

**Figure S7**

**Figure S7. Additional phenotyping of SARS-CoV-2-specific CD4<sup>+</sup> T cell response following vaccination in PAD patients.** (A) Representative flow cytometry plots of the expression of PD1, ICOS, CD38, HLA-DR, and CXCR5 on Tetramer<sup>+</sup> CD4<sup>+</sup> (Live CD3<sup>+</sup> CD19<sup>-</sup> CD4<sup>+</sup> CD8<sup>-</sup> S<sub>167-180</sub><sup>+</sup> or S<sub>816-830</sub><sup>+</sup>) T cells. Percentage of Tetramer<sup>+</sup> CD4<sup>+</sup> T cells that are (B) ICOS<sup>+</sup>PD1<sup>+</sup>, (C) HLA-DR<sup>+</sup>CD38<sup>+</sup>, and (D) CXCR5<sup>+</sup>PD1<sup>+</sup> in healthy donors (left, white), COVID-19-naïve PAD (middle left, red), and COVID-19-experienced PAD (middle right, green) cohorts. Median percentage of Tetramer<sup>+</sup> T cells that comprise each population in all groups is shown on right.

| Patient | Age | Sex | Vaccine Type | Booster Type | Diagnosis     | COVID-19 infection to 1st vaccine (days) |
|---------|-----|-----|--------------|--------------|---------------|------------------------------------------|
| 101     | 59  | F   | Pfizer       | Pfizer       | CVID          | --                                       |
| 102     | 25  | F   | Pfizer       | Pfizer       | CVID          | --                                       |
| 103     | 56  | F   | Pfizer       | --           | CVID          | --                                       |
| 104     | 41  | F   | Pfizer       | Pfizer       | CVID          | --                                       |
| 105     | 30  | M   | Pfizer       | Pfizer       | CVID          | --                                       |
| 106     | 61  | F   | Pfizer       | --           | CVID          | --                                       |
| 107     | 73  | F   | Pfizer       | Pfizer       | Hypogam       | 96                                       |
| 108     | 61  | F   | Pfizer       | Pfizer       | CVID          | --                                       |
| 109     | 37  | F   | J&J          | Pfizer       | SAD           | --                                       |
| 110     | 46  | F   | Pfizer       | Pfizer       | SAD           | --                                       |
| 111     | 59  | F   | Pfizer       | Pfizer       | Hypogam       | --                                       |
| 112     | 44  | M   | Moderna      | Moderna      | CVID          | --                                       |
| 114     | 34  | F   | Pfizer       | --           | SAD           | 90                                       |
| 115     | 20  | F   | Moderna      | --           | CVID          | 181                                      |
| 116     | 26  | F   | J&J          | --           | SAD           | --                                       |
| 117     | 82  | F   | Moderna      | --           | CVID          | --                                       |
| 118     | 61  | F   | Moderna      | --           | CVID          | --                                       |
| 119     | 21  | F   | Pfizer       | Pfizer       | Hypogam       | 276                                      |
| 120     | 41  | F   | Moderna      | Moderna      | CVID          | --                                       |
| 121     | 70  | F   | Pfizer       | Pfizer       | CVID          | --                                       |
| 122     | 49  | F   | Pfizer       | --           | CVID          | 117                                      |
| 123     | 70  | F   | Pfizer       | Pfizer       | Hypogam       | --                                       |
| 124     | 54  | F   | Moderna      | --           | CVID          | 222                                      |
| 125     | 56  | F   | Moderna      | --           | Hypogam       | 106                                      |
| 126     | 57  | M   | J&J          | Pfizer       | CVID          | --                                       |
| 127     | 56  | F   | Pfizer       | Pfizer       | CVID          | --                                       |
| 128     | 63  | F   | Pfizer       | Pfizer       | SAD           | --                                       |
| 129     | 37  | F   | Pfizer       | Pfizer       | CVID          | --                                       |
| 130     | 48  | F   | Moderna      | Moderna      | SAD           | 144                                      |
| 131     | 29  | F   | Pfizer       | --           | CVID          | 36                                       |
| 368-05  | 36  | M   | Pfizer       | --           | Healthy donor | --                                       |
| 368-17  | 37  | M   | Pfizer       | --           | Healthy donor | --                                       |
| 368-24  | 55  | F   | Pfizer       | --           | Healthy donor | --                                       |
| 368-25  | 45  | F   | Pfizer       | --           | Healthy donor | --                                       |
| 368-27  | 47  | M   | Pfizer       | --           | Healthy donor | --                                       |
| 368-29  | 30  | F   | Pfizer       | --           | Healthy donor | --                                       |
| 368-34  | 28  | M   | Pfizer       | --           | Healthy donor | --                                       |
| 368-36  | 48  | F   | Pfizer       | --           | Healthy donor | --                                       |
| 368-37  | 44  | M   | Pfizer       | --           | Healthy donor | --                                       |
| 368-38  | 42  | F   | Pfizer       | --           | Healthy donor | --                                       |
| 368-40  | 33  | F   | Pfizer       | --           | Healthy donor | --                                       |

**Table S1. Characteristics of patient cohort**

F, female; M, male; CVID, common variable immune deficiency; hypogam, hypogammaglobulinemia; SAD, specific antibody deficiency disorder.

| Patient | B cells<br>(% of Live) | IgD <sup>lo</sup><br>(% of CD19 <sup>+</sup> ) | IgD <sup>lo</sup> CD27 <sup>+</sup><br>(% of CD19 <sup>+</sup> ) | CD3 <sup>+</sup> T cells<br>(% of Live) | CD4 <sup>+</sup> T cells<br>(% of CD3 <sup>+</sup> ) | CD8 <sup>+</sup> T cells<br>(% of CD3 <sup>+</sup> ) | CD4 <sup>+</sup> /CD8 <sup>+</sup><br>Ratio |
|---------|------------------------|------------------------------------------------|------------------------------------------------------------------|-----------------------------------------|------------------------------------------------------|------------------------------------------------------|---------------------------------------------|
| 101     | 4.07                   | 34.3                                           | 18.8                                                             | 34.6                                    | 57.6                                                 | 10                                                   | 5.76                                        |
| 102     | 5.21                   | 12.5                                           | 5.16                                                             | 28.3                                    | 47.4                                                 | 28.2                                                 | 1.68                                        |
| 103     | 4.74                   | 11.7                                           | 4.61                                                             | 50.2                                    | 51.4                                                 | 24.5                                                 | 2.10                                        |
| 104*    | 2.9                    | 7.81                                           | 0.53                                                             | 7.72                                    | 44.2                                                 | 13.2                                                 | 3.35                                        |
| 105     | 4.21                   | 11.4                                           | 5.51                                                             | 10.3                                    | 32.4                                                 | 26.1                                                 | 1.24                                        |
| 106*    | 6.13                   | 5.63                                           | 1.68                                                             | 12.7                                    | 52.9                                                 | 8.48                                                 | 6.24                                        |
| 107     | 3.02                   | 27.1                                           | 15.1                                                             | 17.1                                    | 42.9                                                 | 18.9                                                 | 2.27                                        |
| 108     | 4.42                   | 30.6                                           | 17.1                                                             | 11.8                                    | 45.7                                                 | 15.1                                                 | 3.03                                        |
| 109     | 9.89                   | 12.8                                           | 8.27                                                             | 16.5                                    | 48.6                                                 | 16.9                                                 | 2.88                                        |
| 110     | 3.61                   | 32                                             | 18.1                                                             | 18.1                                    | 49.3                                                 | 18                                                   | 2.74                                        |
| 111     | 4.01                   | 44.5                                           | 34.5                                                             | 15.2                                    | 47.8                                                 | 16                                                   | 2.99                                        |
| 112*    | 8.5                    | 10.7                                           | 1.53                                                             | 14.9                                    | 34.6                                                 | 36.5                                                 | 0.95                                        |
| 114     | 6.65                   | 30.9                                           | 20.1                                                             | 24.9                                    | 56.4                                                 | 16.3                                                 | 3.46                                        |
| 115     | 6.78                   | 24.6                                           | 18.1                                                             | 15                                      | 43.6                                                 | 22.9                                                 | 1.90                                        |
| 116     | 1.61                   | 18.8                                           | 11.9                                                             | 15.7                                    | 38.1                                                 | 27.3                                                 | 1.40                                        |
| 117     | 4.45                   | 14.5                                           | 4.97                                                             | 17.2                                    | 50.1                                                 | 4.8                                                  | 10.4                                        |
| 118     | 4.67                   | 14.7                                           | 10.3                                                             | 17.6                                    | 46.5                                                 | 15.6                                                 | 2.98                                        |
| 119     | 4.95                   | 22.8                                           | 11.9                                                             | 15.3                                    | 47.5                                                 | 17.4                                                 | 2.73                                        |
| 120     | 6.99                   | 31.7                                           | 11.9                                                             | 17.6                                    | 46.1                                                 | 11.3                                                 | 4.08                                        |
| 121     | 7.43                   | 21.8                                           | 18.2                                                             | 19.6                                    | 54.9                                                 | 8.01                                                 | 6.85                                        |
| 122     | 6.54                   | 48.9                                           | 11                                                               | 18.6                                    | 39.9                                                 | 9.3                                                  | 4.29                                        |
| 123     | 8.75                   | 10.9                                           | 39.8                                                             | 17.6                                    | 55                                                   | 5.18                                                 | 10.6                                        |
| 124     | 8.08                   | 17.9                                           | 4.09                                                             | 17.2                                    | 48.6                                                 | 21.5                                                 | 2.26                                        |
| 125     | 10.1                   | 13.3                                           | 11.3                                                             | 19.9                                    | 50.3                                                 | 21.5                                                 | 2.34                                        |
| 126*    | 5.89                   | 11.4                                           | 6.62                                                             | 17.7                                    | 48.5                                                 | 14                                                   | 3.46                                        |
| 127     | 4.92                   | 17.1                                           | 4.82                                                             | 19.6                                    | 56.7                                                 | 16.4                                                 | 3.46                                        |
| 128     | 2.77                   | 29.5                                           | 3.09                                                             | 16.3                                    | 44.9                                                 | 19.9                                                 | 2.26                                        |
| 129     | 8.45                   | 8.89                                           | 20.8                                                             | 17.5                                    | 44.1                                                 | 26.6                                                 | 1.66                                        |
| 130     | 6.74                   | 33.9                                           | 3.54                                                             | 18.4                                    | 46                                                   | 27.2                                                 | 1.69                                        |
| 131     | 4.43                   | 8.39                                           | 25.3                                                             | 12.7                                    | 39.1                                                 | 31.2                                                 | 1.25                                        |
| 368-05  | 10.7                   | 12.3                                           | 8.52                                                             | 30.8                                    | 47.3                                                 | 32                                                   | 1.48                                        |
| 368-17  | 8.85                   | 25.1                                           | 15.1                                                             | 19.9                                    | 57.5                                                 | 8.68                                                 | 6.62                                        |
| 368-24  | 7.82                   | 16.3                                           | 11.8                                                             | 28.7                                    | 60.8                                                 | 12.1                                                 | 5.02                                        |
| 368-25  | 13.1                   | 22.9                                           | 17.3                                                             | 21                                      | 48.9                                                 | 10.4                                                 | 4.70                                        |
| 368-27  | 3.12                   | 24.8                                           | 22.4                                                             | 44.5                                    | 33.3                                                 | 22.3                                                 | 1.49                                        |
| 368-29  | 8.19                   | 21.3                                           | 14.1                                                             | 26.6                                    | 48.3                                                 | 19.2                                                 | 2.52                                        |
| 368-34  | 15.7                   | 8.93                                           | 6.25                                                             | 33.6                                    | 43.7                                                 | 11.3                                                 | 3.87                                        |
| 368-36  | 6.64                   | 20.8                                           | 16                                                               | 24.2                                    | 54                                                   | 16.3                                                 | 3.31                                        |
| 368-37  | 6.88                   | 23.9                                           | 18.5                                                             | 22.6                                    | 48.4                                                 | 6.98                                                 | 6.93                                        |
| 368-38  | 7.05                   | 7.13                                           | 4.5                                                              | 11.7                                    | 44.7                                                 | 10.1                                                 | 4.43                                        |
| 368-40  | 9.09                   | 27.1                                           | 17.6                                                             | 24.3                                    | 48.2                                                 | 16                                                   | 3.01                                        |

**Table S2. Cellular phenotype of patient cohort**

\* Patients classified as non-responders (IgD<sup>lo</sup> Spike<sup>+</sup> B cell response <0.02% of total B cells at day 7 to 28 post vaccination).

| Patient             | Most Recent CBC                             |                                           | Lymphocyte Subpopulation at the Time of Diagnosis             |                                        |                                       |                                       |                                      | Immunoglobulin levels at the Time of Diagnosis |                       |                       | Most Recent IgG*** |
|---------------------|---------------------------------------------|-------------------------------------------|---------------------------------------------------------------|----------------------------------------|---------------------------------------|---------------------------------------|--------------------------------------|------------------------------------------------|-----------------------|-----------------------|--------------------|
|                     | WBC                                         | ALC                                       | CD3                                                           | CD4                                    | CD8                                   | CD19                                  | CD16/56                              | IgG                                            | IgA                   | IgM                   |                    |
| <b>Normal range</b> | <b>3.8 - 9.9 (1000s per mm<sup>3</sup>)</b> | <b>1,000 - 4,800 (per mm<sup>3</sup>)</b> | <b>661 - 1963 (per mm<sup>3</sup>)</b>                        | <b>490 - 1294 (per mm<sup>3</sup>)</b> | <b>187 - 781 (per mm<sup>3</sup>)</b> | <b>110 - 488 (per mm<sup>3</sup>)</b> | <b>76 - 467 (per mm<sup>3</sup>)</b> | <b>700 - 1600 mg/dL</b>                        | <b>70 - 400 mg/dL</b> | <b>40 - 230 mg/dL</b> | <b>mg/dL</b>       |
| 101                 | 5.8                                         | 2400                                      | 2118                                                          | 1668                                   | 470                                   | 283                                   | 258                                  | 477                                            | 53                    | 62                    | 1065               |
| 102                 | 4                                           | 1000                                      | 895                                                           | 426                                    | 432                                   | 227                                   | 127                                  | 560                                            | 62                    | 24                    | 1134               |
| 103                 | 4.5                                         | 1674                                      | 1450                                                          | 934                                    | 456                                   | 187                                   | 180                                  | 535                                            | 140                   | 100                   | 828                |
| 104*                | 5.1                                         | 1000                                      | 818                                                           | 601                                    | 193                                   | 251                                   | 18                                   | <40                                            | <4                    | <5                    | 725                |
| 105                 | 12                                          | 1500                                      | 974                                                           | 384                                    | 487                                   | 280                                   | 221                                  | <300                                           | <10                   | <25                   | 947                |
| 106*                | 7.2                                         | 1600                                      | --                                                            | --                                     | --                                    | --                                    | --                                   | 432                                            | 89                    | 95                    | 830                |
| 107                 | 6.5                                         | 1900                                      | 1109                                                          | 775                                    | 294                                   | 80                                    | 88                                   | 514                                            | 72                    | 165                   | 505                |
| 108                 | 9.5                                         | 3500                                      | Reported normal in immunology clinic note                     |                                        |                                       |                                       |                                      | 529                                            | 188                   | 35                    | 938                |
| 109                 | 6.4                                         | 1100                                      | --                                                            | --                                     | --                                    | --                                    | --                                   | 895                                            | 142                   | 105                   | 1345               |
| 110                 | 4.8                                         | 1700                                      | 1632                                                          | 859                                    | 738                                   | 184                                   | 59                                   | 888                                            | 73                    | 37                    | 1462               |
| 111                 | 5.2                                         | 860                                       | --                                                            | --                                     | --                                    | --                                    | --                                   | 465                                            | 151                   | 98                    | 836                |
| 112*                | 4.3                                         | 1000                                      | 1162                                                          | 375                                    | 663                                   | 134                                   | 151                                  | low**                                          | <6                    | <4                    | 1303               |
| 114                 | 8.3                                         | 1900                                      | 1702                                                          | 1054                                   | 547                                   | 243                                   | 41                                   | 911                                            | 221                   | 58                    | 1291               |
| 115                 | 15.6                                        | 2400                                      | --                                                            | --                                     | --                                    | --                                    | --                                   | 340                                            | 12                    | reported nl           | 1261               |
| 116                 | 8                                           | 2400                                      | 1974                                                          | 1167                                   | 690                                   | 262                                   | 71                                   | 983                                            | 162                   | 52                    | 983                |
| 117                 | 5.4                                         | 1600                                      | 2194                                                          | 1646                                   | 549                                   | 462                                   | 144                                  | 553                                            | 175                   | 49                    | 1143               |
| 118                 | 7.3                                         | 1700                                      | Reported normal in immunology clinic note                     |                                        |                                       |                                       |                                      | 213                                            | 14                    | 14                    | 758                |
| 119                 | 5                                           | 2200                                      | 2055                                                          | 1396                                   | 790                                   | 211                                   | 79                                   | 473                                            | 120                   | 167                   | 877                |
| 120                 | 8.3                                         | 2600                                      | 1848                                                          | 1282                                   | 501                                   | 157                                   | 199                                  | 528                                            | 136                   | 155                   | 1164               |
| 121                 | 6.2                                         | 2400                                      | 859                                                           | 716                                    | 119                                   | 95                                    | 227                                  | 488                                            | 121                   | 131                   | 989                |
| 122                 | 10.6                                        | 2720                                      | 3300                                                          | 2274                                   | 1026                                  | 580                                   | 446                                  | 606                                            | 204                   | 30                    | 743                |
| 123                 | 8                                           | 1500                                      | 1055                                                          | 835                                    | 205                                   | 315                                   | 158                                  | 645                                            | 162                   | 45                    | 887                |
| 124                 | 9.1                                         | 1190                                      | Reported low NK cells only in immunology clinic note          |                                        |                                       |                                       |                                      | 502                                            | 42                    | 95                    | 547                |
| 125                 | 4.9                                         | 2000                                      | 1837                                                          | 1086                                   | 725                                   | 475                                   | 308                                  | 387                                            | 255                   | 46                    | 657                |
| 126*                | 4.5                                         | 1600                                      | Reported low CD19 at 39, all others normal in immunology note |                                        |                                       |                                       |                                      | 177                                            | 66                    | <25                   | 860                |
| 127                 | 3.8                                         | 1400                                      | 925                                                           | 638                                    | 287                                   | 64                                    | 43                                   | 516                                            | <25                   | 521                   | 781                |
| 128                 | 7.2                                         | 800                                       | 655                                                           | 389                                    | 236                                   | 209                                   | 78                                   | 629                                            | 196                   | 80                    | 990                |
| 129                 | 5                                           | 1420                                      | --                                                            | --                                     | --                                    | --                                    | --                                   | 261                                            | <10                   | <25                   | 1240               |
| 130                 | 6.27                                        | 1610                                      | --                                                            | --                                     | --                                    | --                                    | --                                   | 814                                            | 99                    | 198                   | 1145               |
| 131                 | 10.79                                       | 1700                                      | --                                                            | --                                     | --                                    | --                                    | --                                   | 346                                            | <10                   | <25                   | 1036               |

**Table S3. PAD patient laboratory values**

CBC - complete blood count; WBC - white blood count, ALC - absolute lymphocyte count; Ig - immunoglobulin; dL - deciliter. Empty cells (dashed lines) indicate that the test was not performed.

\* Patients classified as non-responders (IgD<sup>o</sup> Spike<sup>+</sup> B cell response <0.02% of total B cells at day 7 to 28 post vaccination).

\*\* Pre-IVIG IgG titer was recorded as low in records

\*\*\* Most recent IgG taken while patients are receiving immunoglobulin replacement therapy

-- Data unavailable

| Patient | <i>S. pneumoniae</i> titer** | Tetanus titer IU/ml**** | Diphtheria titer IU/ml**** |
|---------|------------------------------|-------------------------|----------------------------|
| 101     | 8/23                         | N/A                     | --                         |
| 102     | 7/23                         | 0.51                    | --                         |
| 103     | 10/23                        | Positive                | Positive                   |
| 104*    | 0/23                         | Positive                | --                         |
| 105     | 0/23***                      | Negative                | --                         |
| 106*    | 4/13                         | 4.59                    | --                         |
| 107     | 4/23                         | 0.97                    | 0.09                       |
| 108     | 2/23                         | 0.06                    | 0.01                       |
| 109     | 6/23                         | >7                      | 2.34                       |
| 110     | 5/23                         | N/A                     | --                         |
| 111     | 11/14                        | 0.98                    | --                         |
| 112*    | --                           | N/A                     | --                         |
| 114     | 12/23                        | 1.56                    | --                         |
| 115     | Unprotective                 | --                      | --                         |
| 116     | 14/23                        | 0.36                    | Positive                   |
| 117     | 11/23                        | 0.01                    | --                         |
| 118     | --                           | --                      | --                         |
| 119     | 19/23                        | 0.45                    | --                         |
| 120     | 14/23                        | >2.24                   | --                         |
| 121     | 8/23                         | 0.46                    | --                         |
| 122     | 10/23                        | 0.72                    | --                         |
| 123     | 20/23                        | >2.24                   | --                         |
| 124     | 2/14                         | --                      | --                         |
| 125     | 16/23                        | 2.2                     | --                         |
| 126*    | 3/23***                      | 0.24                    | Undetectable               |
| 127     | 0/23                         | --                      | --                         |
| 128     | 14/23                        | 0.87                    | 0.07                       |
| 129     | 0/23                         | --                      | --                         |
| 130     | 0/23                         | 2.75                    | --                         |
| 131     | --                           | 1.73                    | 0.35                       |

**Table S4. PAD patient responses to other vaccine antigens at the time of diagnosis**

IU - international unit. N/A - data was obtained but not available in the medical record. Dashed lines indicate that the test was not performed.

\* Patients classified as non-responders (IgD<sup>lo</sup> Spike<sup>+</sup> B cell response <0.02% of total B cells at day 7 to 28 post vaccination).

\*\* Indicates the number of tested anti-*Streptococcus pneumoniae* serotypes with a level above 1.3 µg/ml 4-6 weeks following pneumovax booster vaccination.

\*\*\* Pre-pneumovax booster values; patient started on immunoglobulin replacement prior to post-booster recheck.

\*\*\*\* A value of ≥ 0.01 IU/ml is considered positive. In some records, a positive notation was indicated but no value was provided.

-- Data unavailable
